# Supplementary material for: Differences in Anthocyanin Accumulation Profiles between Teinturier and Non-Teinturier Cultivars during Ripening
Source: MDPI journal article supplement (doi:10.3390/foods10051073), 2021-05-12
Supplement: s1 [file s1]

**Table S1.** Specific primers used for qRT-PCR.

| Gene           |         | Primer (5'→3')          |
|----------------|---------|-------------------------|
| <i>VvActin</i> | Forward | CTTGCATCCCTCAGCACCTT    |
|                | Reverse | TCCTGTGGACAATGGATGGA    |
| <i>VvOMT</i>   | Forward | CCATAAGCAAACCCTAAACC    |
|                | Reverse | TGAACAAATTCTTGGCATCA    |
| <i>VvUFGT</i>  | Forward | GGGATGGTAATGGCTGTGG     |
|                | Reverse | ACATGGGTGGAGAGTGAGTT    |
| <i>VvGST1</i>  | Forward | CCAAAGAGCAAAAAGCCAAGT   |
|                | Reverse | TGTCCAGAAAACCCAAAGTC    |
| <i>VvGST2</i>  | Forward | CCCAACCCCTGAAAATCTTGCT  |
|                | Reverse | AGCGACAACCTCGCATCACTG   |
| <i>VvGST3</i>  | Forward | GTGGAACAATGGCTGGAGGT    |
|                | Reverse | CAC TTTCGCATCTGGGGGAA   |
| <i>VvGST4</i>  | Forward | CCTACCTCGAATGGGTGAGC    |
|                | Reverse | GTAACCAAGTGCGCCATTCC    |
| <i>AM1</i>     | Forward | TGCTTTTGTGATTTTGTTAGAGG |
|                | Reverse | CCCTTCCCCGATTGAGAGTA    |
| <i>AM3</i>     | Forward | TGCTTTTGTGATTTTGTTAGAGG |
|                | Reverse | CCCTTCCCCGATTGAGAGTA    |

**Table S2.** The identification of anthocyanin in 5 cultivars (mg/g DW grape skin).

|                    | Cabernet Sauvignon |                 |                  | Pinot Noir    |                 |                 | Syrah         |                 |                   | Yan 73         |                  |                   | Dunkelfelder    |                  |                  |
|--------------------|--------------------|-----------------|------------------|---------------|-----------------|-----------------|---------------|-----------------|-------------------|----------------|------------------|-------------------|-----------------|------------------|------------------|
|                    | 8WAA               | 12WAA           | 16WAA            | 8WAA          | 12WAA           | 16WAA           | 8WAA          | 12WAA           | 16WAA             | 8WAA           | 12WAA            | 16WAA             | 8WAA            | 12WAA            | 16WAA            |
| Dp                 | 32.83 ± 0.05       | 909.58 ± 1.02   | 1276.06 ± 25.74  | 13.15 ± 0.00  | 125.84 ± 0.03   | 358.86 ± 0.13   | 59.26 ± 0.10  | 941.33 ± 0.47   | 1151.80 ± 5.40    | 123.13 ± 0.08  | 6400.06 ± 2.31   | 11717.82 ± 10.76  | 107.08 ± 1.10   | 3906.72 ± 0.93   | 7589.28 ± 3.54   |
| Cy                 | 1.54 ± 0.05        | 132.18 ± 0.10   | 160.72 ± 0.03    | 1.03 ± 0.00   | 19.71 ± 0.46    | 161.20 ± 0.52   | 9.05 ± 0.10   | 167.37 ± 14.67  | 178.10 ± 0.57     | 30.40 ± 0.03   | 1509.25 ± 0.51   | 2578.87 ± 39.19   | 28.47 ± 1.14    | 772.55 ± 0.08    | 1777.51 ± 1.97   |
| Pt                 | 18.38 ± 0.10       | 667.00 ± 0.11   | 875.49 ± 0.30    | 14.97 ± 0.00  | 236.17 ± 0.95   | 399.08 ± 0.57   | 60.11 ± 0.13  | 1102.06 ± 1.19  | 1336.19 ± 7.43    | 117.89 ± 0.18  | 5316.68 ± 2.82   | 9600.74 ± 62.08   | 148.85 ± 1.40   | 4029.92 ± 1.38   | 7195.35 ± 7.33   |
| Pn                 | 19.26 ± 0.00       | 668.01 ± 0.17   | 813.28 ± 0.64    | 64.05 ± 0.00  | 1090.68 ± 0.66  | 1841.33 ± 0.32  | 71.15 ± 0.39  | 893.85 ± 0.70   | 1291.49 ± 6.86    | 211.92 ± 0.26  | 5981.98 ± 32.68  | 12101.42 ± 34.38  | 130.73 ± 2.40   | 3518.71 ± 1.12   | 7701.94 ± 10.80  |
| Mv                 | 112.40 ± 0.13      | 4453.52 ± 0.21  | 6653.84 ± 4.70   | 192.80 ± 0.00 | 5140.69 ± 20.23 | 4820.65 ± 2.54  | 264.46 ± 0.26 | 4334.14 ± 2.33  | 6333.70 ± 25.35   | 763.03 ± 0.40  | 20963.90 ± 99.55 | 36615.84 ± 18.28  | 595.57 ± 3.39   | 18625.23 ± 3.75  | 29708.69 ± 26.05 |
| Dp-ac              | 3.02 ± 0.18        | 250.43 ± 0.13   | 317.26 ± 0.72    | nd            | nd              | nd              | nd            | 259.61 ± 0.21   | 256.20 ± 0.05     | 12.26 ± 0.05   | 1549.749 ± 19.55 | 2478.50 ± 9.60    | 23.05 ± 1.76    | 559.62 ± 0.21    | 1090.78 ± 7.69   |
| Cy-ac              | nd                 | 35.16 ± 0.05    | 75.15 ± 3.91     | nd            | nd              | nd              | nd            | 59.64 ± 1.29    | 68.28 ± 2.37      | nd             | 312.56 ± 8.52    | 653.09 ± 1.46     | nd              | 127.83 ± 0.05    | 214.44 ± 1.60    |
| Pt-ac              | nd                 | 269.32 ± 0.93   | 329.31 ± 1.29    | nd            | nd              | nd              | nd            | 389.367 ± 0.26  | 407.91 ± 9.17     | 15.98 ± 0.15   | 1622.33 ± 14.85  | 2521.52 ± 4.68    | 27.97 ± 1.19    | 717.30 ± 1.61    | 1103.31 ± 5.80   |
| Dp-co              | nd                 | 82.66 ± 1.03    | 166.59 ± 5.49    | nd            | nd              | nd              | nd            | 71.65 ± 3.99    | 132.37 ± 17.87    | nd             | 437.91 ± 24.13   | 755.25 ± 4.94     | nd              | 347.29 ± 1.60    | 529.90 ± 17.16   |
| Pn-ac              | 9.55 ± 1.34        | 396.97 ± 0.59   | 467.46 ± 4.89    | nd            | nd              | nd              | 26.90 ± 0.15  | 969.19 ± 2.29   | 1032.02 ± 16.18   | 42.23 ± 0.10   | 1838.86 ± 24.49  | 3028.94 ± 10.78   | 46.05 ± 0.05    | 1189.10 ± 0.66   | 1818.99 ± 1.91   |
| Mv-ac              | 80.74 ± 2.76       | 3212.91 ± 3.66  | 4226.38 ± 4.45   | nd            | nd              | nd              | 52.26 ± 0.77  | 2205.99 ± 0.85  | 2940.27 ± 19.64   | 217.25 ± 0.54  | 7064.89 ± 11.84  | 10519.05 ± 14.23  | 131.90 ± 1.12   | 3912.87 ± 0.23   | 5270.74 ± 5.76   |
| Cy-co              | nd                 | 14.28 ± 0.52    | nd               | nd            | nd              | nd              | nd            | 62.60 ± 0.62    | 23.02 ± 0.59      | nd             | nd               | nd                | nd              | 27.18 ± 1.31     | 47.81 ± 0.44     |
| Mv-ca              | nd                 | 116.76 ± 0.28   | nd               | nd            | nd              | nd              | nd            | 376.21 ± 1.06   | 232.54 ± 0.31     | nd             | nd               | 279.13 ± 3.12     | nd              | 276.10 ± 1.83    | 367.66 ± 4.89    |
| Pt-co              | nd                 | 73.48 ± 0.28    | 46.45 ± 0.41     | nd            | nd              | nd              | 9.23 ± 0.05   | 586.84 ± 0.66   | 624.89 ± 1.57     | 2.93 ± 0.05    | 574.15 ± 0.17    | 756.13 ± 1.25     | 28.79 ± 0.03    | 771.59 ± 0.87    | 969.71 ± 3.52    |
| c-Pn-co            | nd                 | 1.35 ± 0.10     | 102.50 ± 4.71    | nd            | nd              | nd              | nd            | 86.48 ± 0.08    | 46.67 ± 0.23      | nd             | nd               | 17.28 ± 3.94      | nd              | 16.58 ± 1.31     | 33.11 ± 0.28     |
| c-Mv-co            | nd                 | 46.99 ± 0.08    | 483.39 ± 1.67    | nd            | nd              | nd              | nd            | 1195.09 ± 3.09  | 146.00 ± 0.10     | nd             | 71.21 ± 0.08     | 97.01 ± 7.29      | nd              | 93.48 ± 0.90     | 123.25 ± 1.11    |
| t-Pn-co            | nd                 | 173.91 ± 0.03   | 207.85 ± 0.23    | nd            | nd              | nd              | 26.01 ± 0.41  | nd              | 1233.82 ± 7.18    | 10.81 ± 0.15   | 644.22 ± 0.23    | 1088.63 ± 7.96    | 24.47 ± 0.15    | 682.46 ± 0.23    | 1094.36 ± 4.09   |
| t-Mv-co            | 15.57 ± 0.49       | 1005.02 ± 0.15  | 1455.55 ± 1.14   | nd            | nd              | nd              | 70.39 ± 0.33  | 3382.47 ± 0.49  | 4443.15 ± 15.89   | 88.59 ± 0.21   | 3317.93 ± 1.04   | 4518.22 ± 2.03    | 145.82 ± 1.04   | 4634.41 ± 3.41   | 5481.59 ± 1.27   |
| Total anthocyanins | 293.30 ± 4.17      | 12509.52 ± 2.25 | 17257.28 ± 30.15 | 286.01 ± 0.00 | 6613.09 ± 10.62 | 7581.12 ± 12.83 | 648.82 ± 1.62 | 17173.88 ± 7.50 | 21878.42 ± 135.94 | 1636.42 ± 0.81 | 57739.33 ± 78.30 | 99327.44 ± 158.01 | 1438.75 ± 10.39 | 44208.97 ± 14.61 | 72118.42 ± 56.08 |

Note: 'nd' means not detected. Dp, delphinidin-3-glucoside. Cy, cyanidin-3-glucoside. Pt, petunidin-3-glucoside. Pn, peonidin-3-glucoside. Mv, malvidin-3-glucoside. Dp-ac, delphinidin-3-glu acetate. Cy-ac, cyanidin -3-glu acetate. Pt-ac, petunidin-3-glu acetate. Dp-co, delphinidin-3-glu coumarate. Pn-ac, peonidin-3-glu acetate. Mv-ac, malvidin-3-glu acetate. Cy-co, cyanidin -3-glu coumarate. Mv-ca, malvidin-3-glu caffeate. Pt-co, petunidin-3-glu coumarate. c-Pn-co, cis-peonidin-3-glu coumarate, c-Mv-co, cis-malvidin-3-glu coumarate. t-Pn-co, trans-peonidin-3-glu coumarate. t-Mv-co, trans-malvidin-3-glu coumarate.

**Table 3.** Ratio of anthocyanin components.

| Cultivars          | WAA | Cyanidins         | Delphinidins         | Peonidins           | Petunidins          | Malvidins            |
|--------------------|-----|-------------------|----------------------|---------------------|---------------------|----------------------|
| Cabernet Sauvignon | 8   | 1.54 ± 0.84eD     | 35.85 ± 0.49bC       | 28.81 ± 0.69cD      | 18.38 ± 0.09dD      | 208.72 ± 5.22aC      |
|                    | 12  | 181.62 ± 6.25cC   | 1242.67 ± 15.35bC    | 1240.23 ± 8.68bD    | 1009.8 ± 24.24bD    | 8835.2 ± 309.23aBC   |
|                    | 16  | 235.88 ± 3.25dC   | 1759.91 ± 18.88bC    | 1591.09 ± 12.73bcDE | 1251.25 ± 55.06cD   | 12419.16 ± 149.03aC  |
| Pinot Noir         | 8   | 1.03 ± 0.26dD     | 13.15 ± 0.65cD       | 64.05 ± 2.56bC      | 14.97 ± 0.19cD      | 192.8 ± 9.64aC       |
|                    | 12  | 19.71 ± 0.95eD    | 125.84 ± 2.85dD      | 1090.68 ± 5.45bD    | 236.17 ± 11.34cE    | 5226.35 ± 109.75aC   |
|                    | 16  | 200.65 ± 5.40dCD  | 436.00 ± 17.4cD      | 1981.67 ± 11.89bD   | 428.27 ± 6.42cE     | 5524.78143.64aD      |
| Syrah              | 8   | 9.05 ± 0.28dC     | 59.26 ± 3.28cB       | 124.06 ± 3.85bB     | 69.34 ± 2.77cC      | 387.11 ± 1.94aB      |
|                    | 12  | 289.61 ± 3.74dC   | 1272.59 ± 18.82cC    | 2039.52 ± 93.82bC   | 2078.27 ± 85.21bC   | 11493.9 ± 218.38aB   |
|                    | 16  | 269.40 ± 3.90eC   | 1540.36 ± 13.90dC    | 3604.01 ± 25.23bC   | 2368.99 ± 14.21cC   | 14095.65 ± 521.54aC  |
| Yan 73             | 8   | 30.40 ± 0.85dA    | 135.39 ± 1.28cA      | 264.95 ± 3.71bA     | 136.8 ± 5.06cB      | 1068.87 ± 28.86aA    |
|                    | 12  | 1955.48 ± 23.36cA | 8387.7 ± 51.00bA     | 8465.06 ± 33.86bA   | 7513.16 ± 37.57bA   | 31417.93 ± 1162.46aA |
|                    | 16  | 3231.97 ± 33.42dA | 14951.57 ± 128.84bcA | 16236.26 ± 204.94bA | 12878.39 ± 489.38cA | 52029.25 ± 1352.76aA |
| Dunkelfelder       | 8   | 24.94 ± 1.60cB    | 146.91 ± 3.68bA      | 235.31 ± 3.47bA     | 183.72 ± 4.29bA     | 882.82 ± 22.69aA     |
|                    | 12  | 927.56 ± 5.60cB   | 4813.64 ± 25.12bB    | 5406.86 ± 16.22bB   | 5518.81 ± 11.04bB   | 27542.1 ± 936.43aA   |
|                    | 16  | 2039.76 ± 11.65cB | 9209.96 ± 84.39bB    | 10648.4 ± 95.85bB   | 9268.37 ± 185.37bB  | 40951.93 ± 1883.79aB |

Note: Results were expressed as means ± SD of three biological replicates for ( $n = 3$ ). Different lowercase letters in the same line demonstrated that the difference was significant ( $p < 0.05$ ). Capital letters in the same row and same period demonstrated that the difference was significant ( $p < 0.05$ ).

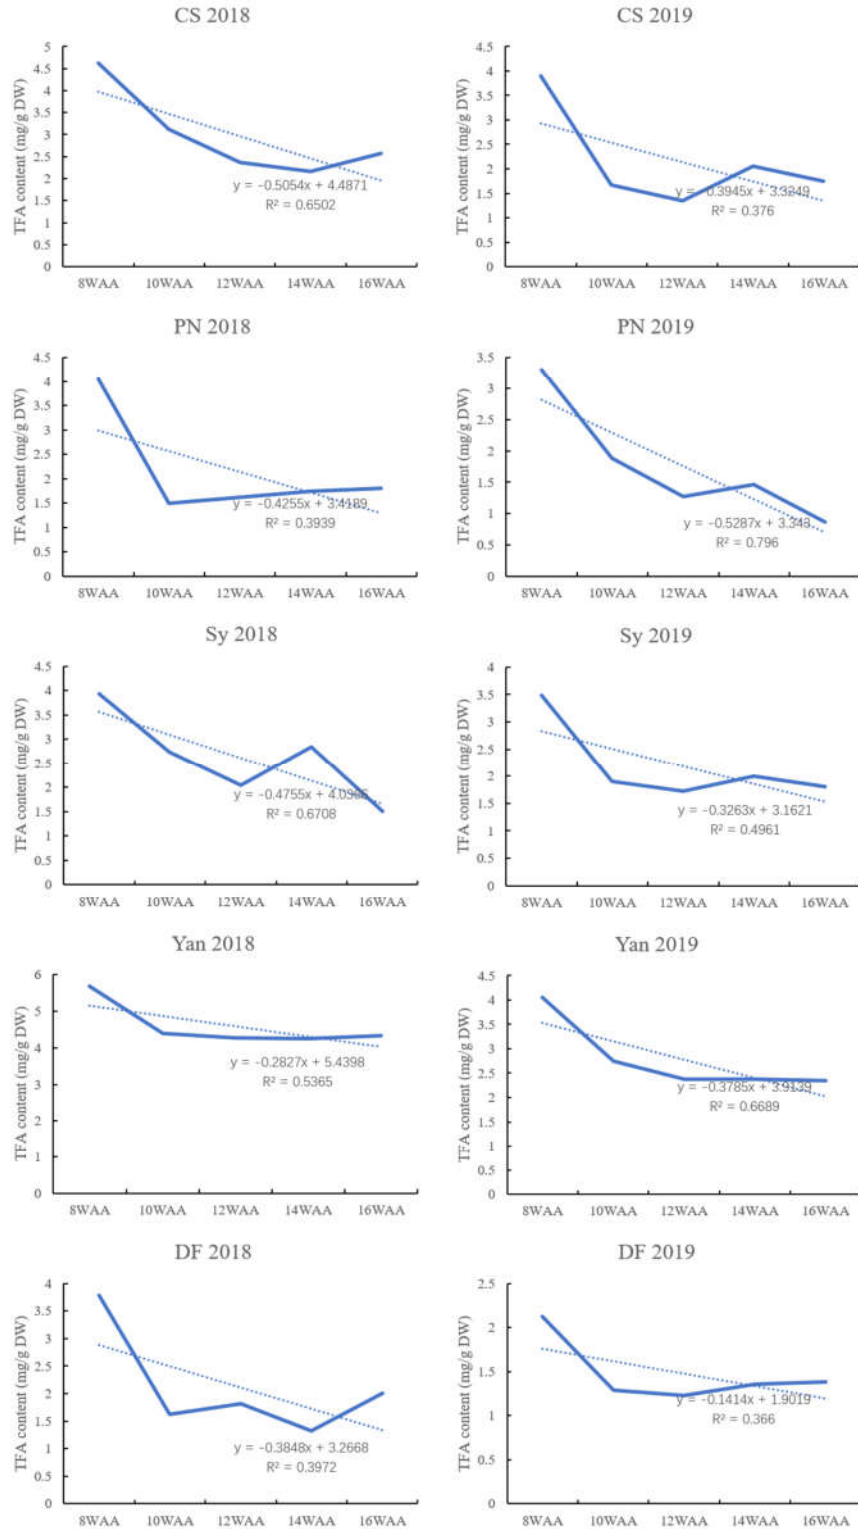

Figure S1 Regression analysis of TFA content.

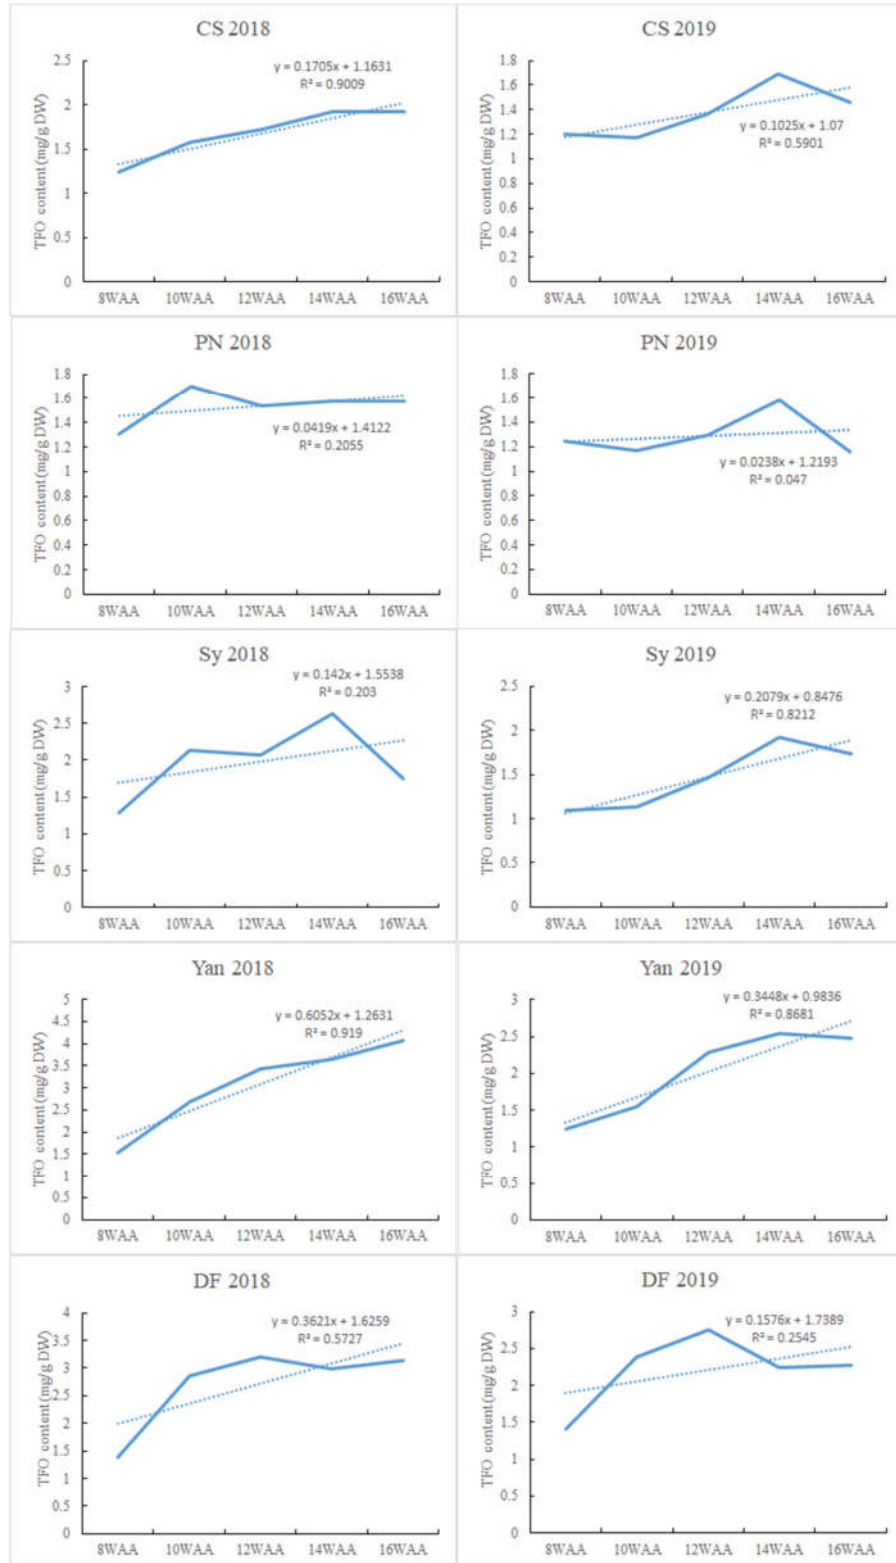

Figure S2 Regression analysis of TFO content.
